# Supplementary material for: The effect of hybrid coatings based on hydrogel, biopolymer and inorganic components on the corrosion behavior of titanium bone implants
Source: Royal Society of Chemistry journal article supplement (doi:10.1039/c9tb01287g), 2019-01-01
Supplement: c9tb01287g1.pdf [file c9tb01287g1.pdf]

## Supplementary information

### The effect of hybrid coatings based on hydrogel, biopolymer and inorganic component on the corrosion behavior of titanium bone implants

Mariia Saveleva,<sup>\*a,b</sup> Alina Vladescu,<sup>c,d</sup> Cosmin Cotrut,<sup>d,e</sup> Louis Van der Meeren<sup>a</sup>, Maria Surmeneva<sup>d</sup>, Roman Surmenev<sup>d</sup>, Bogdan Parakhonskiy<sup>a</sup> and Andre G. Skirtach<sup>a</sup>

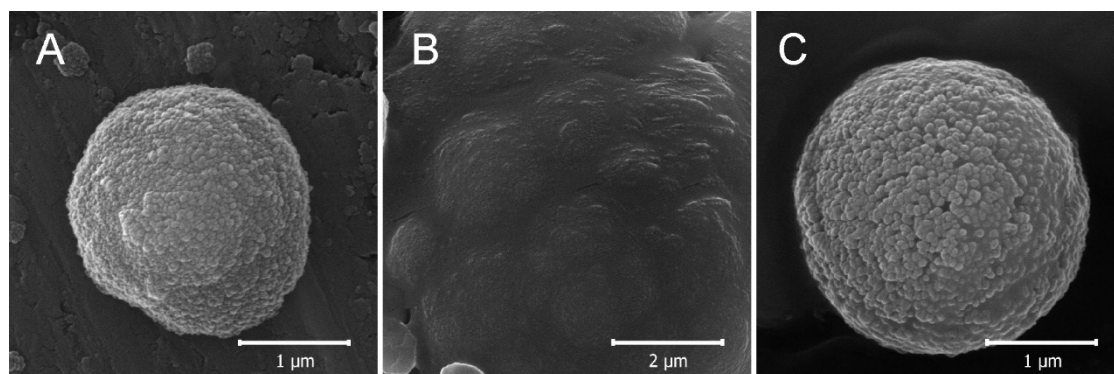

Figure S1. SEM images of CaCO<sub>3</sub> microparticles composing the coatings of Ti-CaCO<sub>3</sub> (A), Ti-Alg-CaCO<sub>3</sub> (B), Ti-DS-CaCO<sub>3</sub> (C).

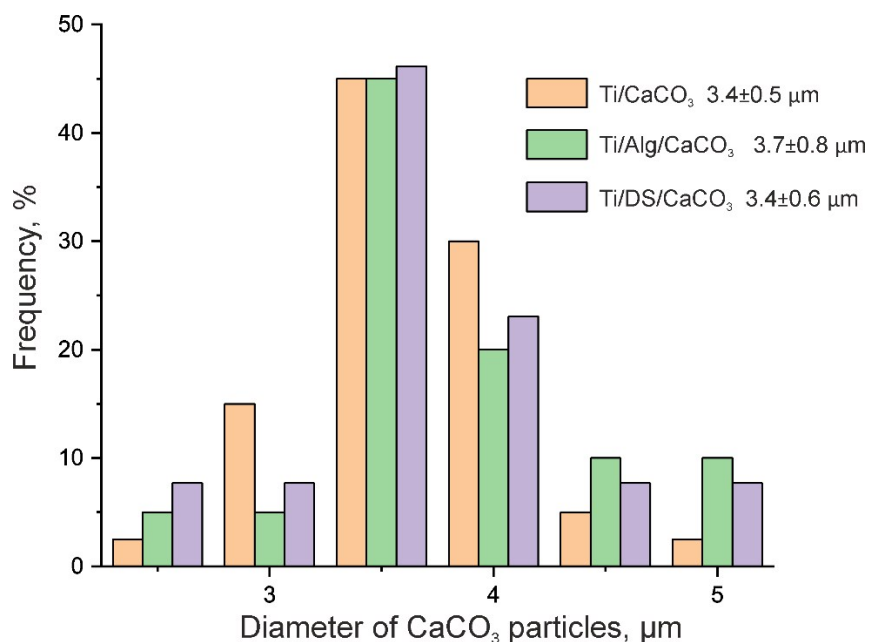

Figure S2. Size distribution of CaCO<sub>3</sub> particles composing coatings at the Ti surface

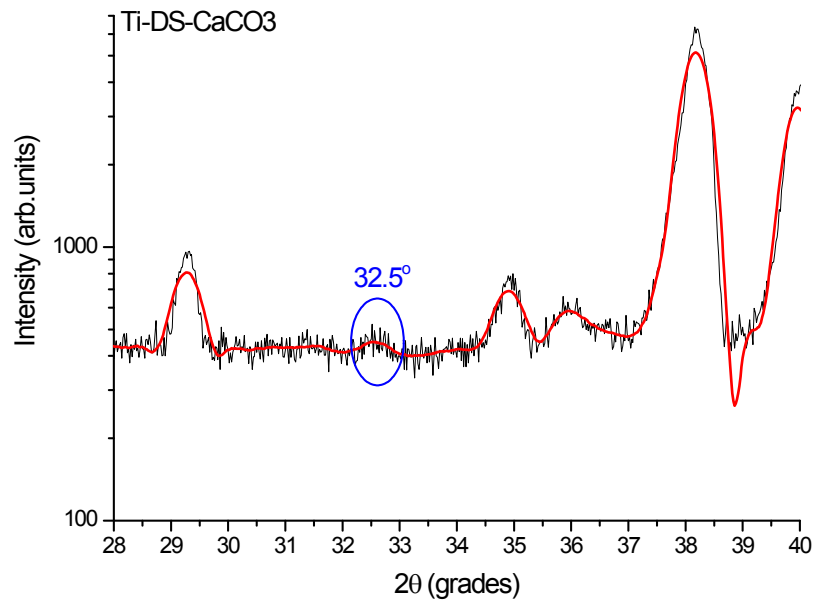

Figure S3. X-ray diffractogram (magnified section) of the Ti-DS-CaCO<sub>3</sub> surface after immersion test in SBF, demonstrating the presence of 211 plane at 32.5°, indicating the presence of vaterite
